# Supplementary material
Source: publisher figshare collection journal article supplement (https://tandf.figshare.com/articles/dataset/_/7377899)
Supplement: Supplementary file 1 [file 1]

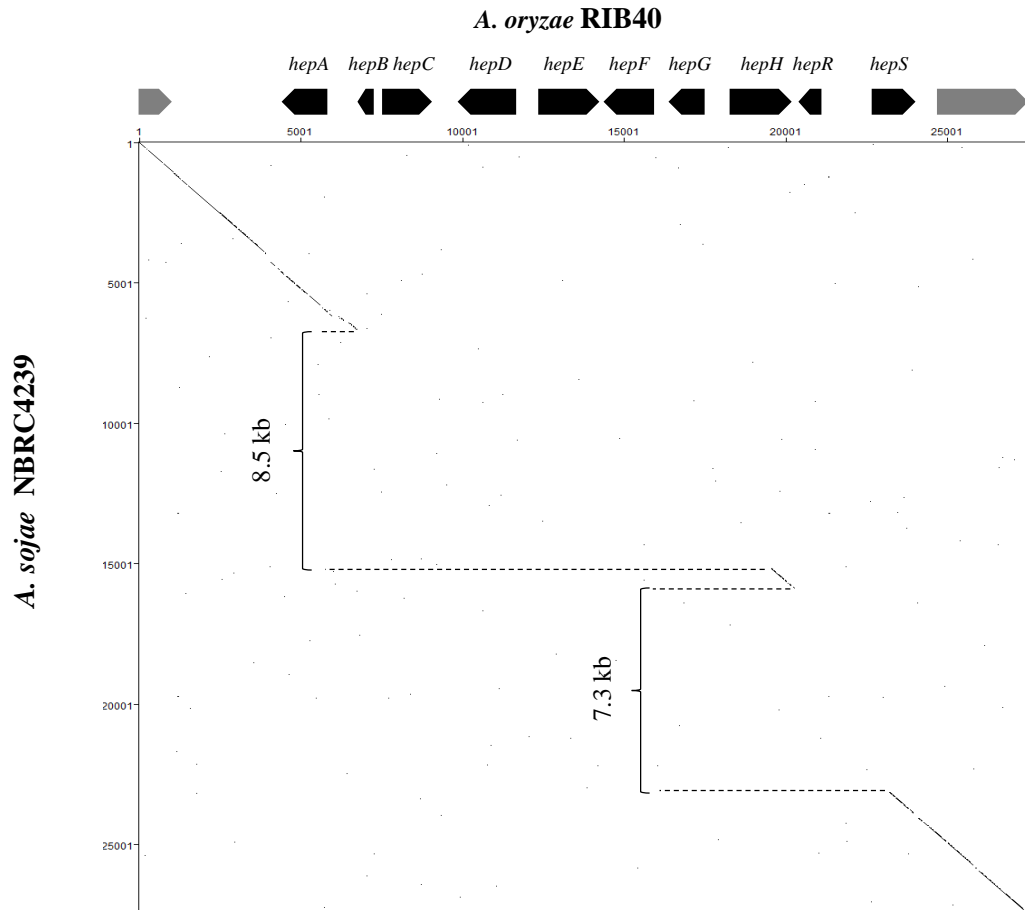

**Figure S1. Dot-plot analysis of genomic sequence surrounding the HA cluster.** The genomic sequence from AO090011000406 to 418 in *A. oryzae* RIB40 was compared with the corresponding sequence in *A. sojae* NBRC 4239. Dots were plotted when 8 of 10 bases matched.

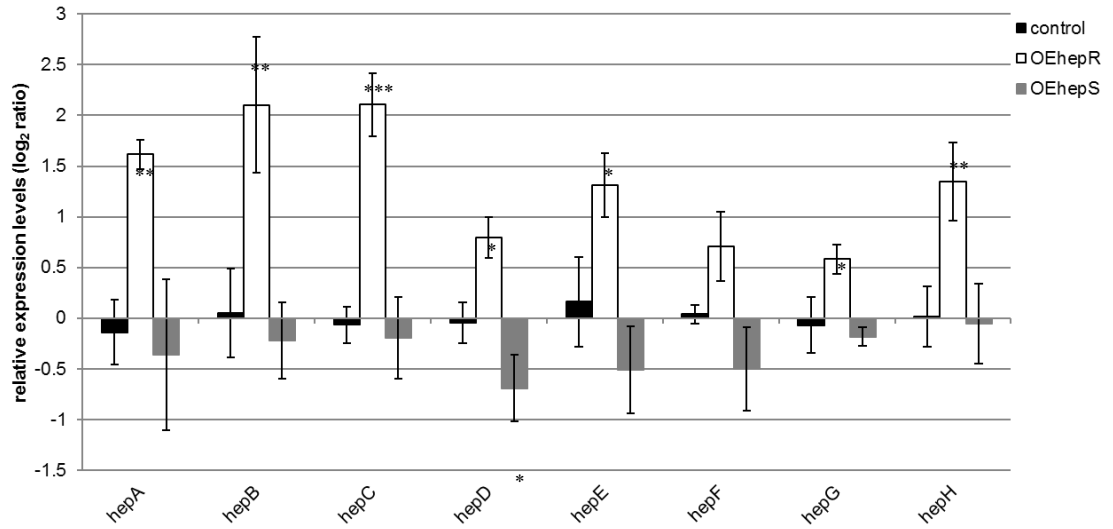

**Figure S2. Gene expression levels of HA cluster genes in *hepR* and *hepS* overexpression strains.** The relative expression levels of each gene were determined by qRT-PCR. Histone 2B was used as an endogenous reference gene. All data are presented as mean  $\pm$  SD (n = 3). Asterisks represent significant difference compared with the control strain by Dunnett's test (\*\* $p < 0.001$ , \*\* $p < 0.01$ , \* $p < 0.05$ ). RKuAFN *niaD*<sup>+</sup> was used as a control strain.

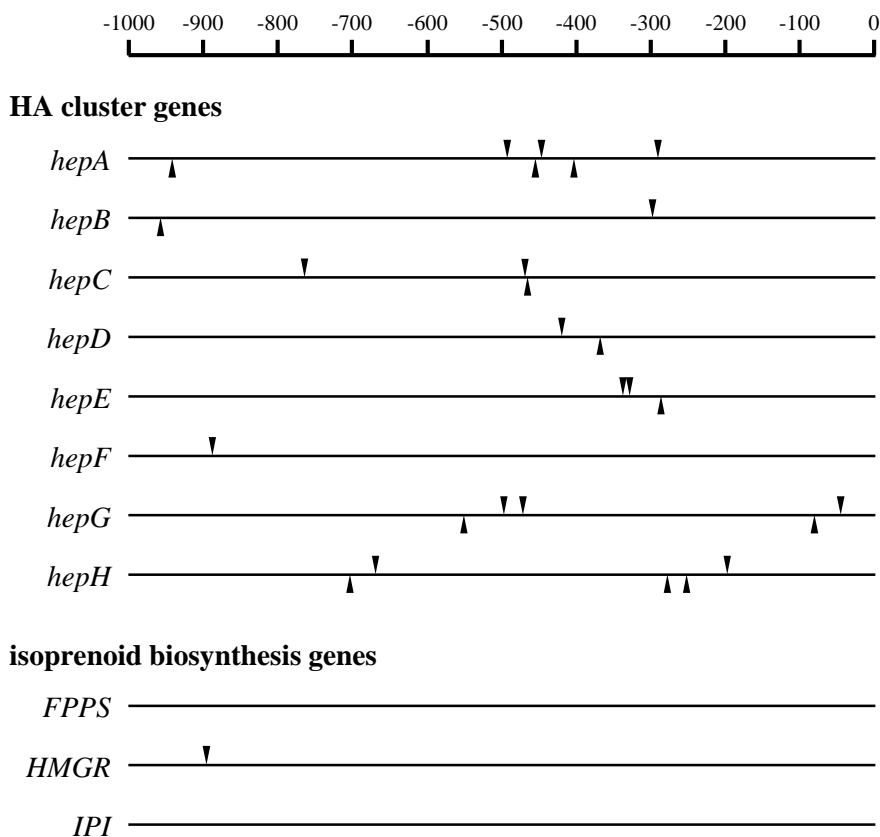

**Figure S3. Positions of the Tri6 binding motif in the 5'-flanking region of HA cluster genes and isoprenoid biosynthesis genes in *A. oryzae*.** The horizontal lines represent 1000 bp upstream of the translation initiation site of each gene. Each triangle represents the position of the sequence YNAGGCC in the forward or reverse strand.

Table S1. PCR primers used in this study

| Primer name | Sequence (5' to 3')                    | Primer name | Sequence (5' to 3')                         |
|-------------|----------------------------------------|-------------|---------------------------------------------|
| hepA-LU     | TAGCTAGCATCTCTGGAGTGAG                 | hepD-LU     | AGAGACCCGTAATGTGTGCCCAA                     |
| hepA-LL     | AGGGTACGTCTGTTGTCTTCTTAGGGGGATAGAGA    | hepD-LL     | GTACGTCTGTTGTGCGACTGTTCCCCGAGCGAGTGA        |
| hepA-RU     | CTTCTGAGGTGCAGTTTCGTATCTAATGACCTCCTG   | hepD-RU     | CTGAGGTGCAGTTTCAGAATCGCCTCCAGCACGAGC        |
| hepA-RL     | ACTGTTTACTAGGGCCACCT                   | hepD-RL     | ACCTTGTGCTTGGAGTCCAGACTGA                   |
| hepA-LU-2   | GAACGCGCAAATGGCTCGACT                  | hepD-LU-2   | CTGGGCGTATCGTGGGTCCATAG                     |
| hepA-RL-2   | GCCATCAGTGCCCTCCGTACA                  | hepD-RL-2   | TTCACAGGGTGCAAGTTCACCCAT                    |
| hepR-LU     | TCTTCTGCCTAGTTACGGAGGACT               | hepE-LU     | GCTCGTCCTAAGAGTGGCCAG                       |
| hepR-LL     | GTACGTCTGTTGTGCCATCGACAGAACATCACGCGA   | hepE-LL     | GTACGTCTGTTGTAGAGACCCGTAATGTGTGCCCAATG      |
| hepR-RU     | CTGAGGTGCAGTTCAGCCACTACGCGGGTCAAGA     | hepE-RU     | CTGAGGTGCAGTTCATGGACCATCTGAAGCTCTCGGA       |
| hepR-RL     | ATCCTCGACGCTGCAGGAGACT                 | hepE-RL     | CAGTGTGACGCATCGCTCGGTT                      |
| hepR-LU-2   | GGTACGGAGTACTGATCCGCCT                 | hepE-LU-2   | TGGCCAGGATATCGAGCCAGAG                      |
| hepR-RL-2   | ACTCCGCCTTAGAGCTGCGACT                 | hepE-RL-2   | CCAGAGCATCGACTGCCCATGA                      |
| hepS-LU     | AGGCGGATCAGTACTCCGTACC                 | hepF-LU     | TGCTGCTCAGAACCTGATCCCGA                     |
| hepS-LL     | GTACGTCTGTTGTCTTGTGTCAGTAGACTGAGGCAC   | hepF-LL     | GTACGTCTGTTGTTGGCGACCAATTCAATGGGTTCGTG      |
| hepS-RU     | CTGAGGTGCAGTTTATTTCCGGCGGAGATTAGTCCGCA | hepF-RU     | CTGAGGTGCAGTTCAGAGCATCGACTGCCCATGATG        |
| hepS-RL     | ACTGCGCAAGTTCATCCTGGGT                 | hepF-RL     | ATGGCGGATCTGGCTCGCAATC                      |
| hepS-LU-2   | TTCAGTCCTCCGTAAGTAGGCAGA               | hepF-LU-2   | CAACCTCCAATGTGTCCGTGGTTGA                   |
| hepS-RL-2   | GTCTTGCATCCAAAGATGAGCCA                | hepF-RL-2   | CCATGGACCATCTGAAGCTCTCGGA                   |
| pyrG-U      | ACAACAGACGTACCCTGTGATGTTT              | hepG-LU     | ATTGCCGGTCATGATCCTCCGTGT                    |
| pyrG-L      | AACTGCACCTCAGAAGAAAAGGATG              | hepG-LL     | GTACGTCTGTTGTTGCCGTTGACAACAATGGAGTCACC      |
| pyrG-LU     | ACAACAGACGTACCCTGTGATGTTT              | hepG-RU     | CTGAGGTGCAGTTCAACCTCCAATGTGTCCGTGGTTGA      |
| pyrG-LL     | AGTTTGGTACTGCTGGGTACGCCAAATCCAGCAGCTCT | hepG-RL     | TGGCGACCAATTCAATGGGTTCGTG                   |
| pyrG-RU     | CAGCAGTACCAAACTCCTGAGTCG               | hepG-LU-2   | GATCCGACGGAAGTTGGGCGTC                      |
| pyrG-RL     | AACTGCACCTCAGAAGAAAAGGATG              | hepG-RL-2   | AGAGGCCGTAAATCACTGCGGTCT                    |
| pyrG-LU-2   | GGTAATGTGCCCCAGGCTTGTC                 | hepH-LU     | GAGTTGCGGAATACGATCCGACCGA                   |
| pyrG-RL-2   | TTATGGCCGCTGTGCGATCAGGA                | hepH-LL     | GTACGTCTGTTGTTTCCGAGGGTCAGTCTGCCAT          |
| hepB-LU     | GTCGACAAGCTTGCGATGCCAT                 | hepH-RU     | CTGAGGTGCAGTTCCTGTTAGCATGAGCCACGGAGAT       |
| hepB-LL     | GTACGTCTGTTGTAGCAACTACTCCAGAGATGCT     | hepH-RL     | TTGTAGGACCCGGTGCTGTGACA                     |
| hepB-RU     | CTGAGGTGCAGTTTGCTGCGTATTGAGGAGGTCT     | hepH-LU-2   | GTAAGACGCCCCAATTCCGTCG                      |
| hepB-RL     | GTATGCTCGGGGTACAGATCCTGC               | hepH-RL-2   | GACCCAAGGATTCAATGCCCTTGTC                   |
| hepB-LU-2   | GCACAGCGAACTGGCCCTT                    | OEhepR-U    | TTTGAATTCGAATCGATATGGCTGAAACATGGATGGCTCTTC  |
| hepB-RL-2   | AGATTTGGCCACCTTCATCGGTG                | OEhepR-L    | TACCCGGGTCACTAGTTTCACTTCTTGCCTCGATTTCATGATG |
| hepC-LU     | AAGTCGAGCCATTTGCGCGTTC                 | OEhepS-U    | TTTGAATTCGAATCGATATGATCTCAATGAGTGTACCTAG    |
| hepC-LL     | GTACGTCTGTTGTGCCAACTCCTGCAGAGTCGA      | OEhepS-L    | TACCCGGGTCACTAGTTTATGTAAGTAGTATTGGAGCT      |
| hepC-RU     | CTGAGGTGCAGTTCTGACAAGCGTTACCCGTTGCA    | gpdA-U      | TCGCCATATGGCTACCCCAAGGTTGGAATC              |
| hepC-RL     | ATCGGTGTTGGGATGCCCATGT                 | gpdA-L      | ACTGCTGCAGCTACTGGCCATCGACCTTGAGATG          |
| hepC-LU-2   | GGTACTGCAACGCATTGGGTTCGT               | gpdB-U      | TCGCCATATGACCGCTAAAGTTGGTATC                |
| hepC-RL2    | TGGGTGAACTTGCACCTGTGA                  | gpdB-L      | ACTGCTGCAGCTACTTCCCAACACTGGCAA              |

Table S2. qRT-PCR primers used in this study

| Primer name | Sequence (5' to 3')       | Target gene                        |
|-------------|---------------------------|------------------------------------|
| hepA qRT-F  | GACCGTCTTCAGACCTGCACA     | AO090011000408 (hepA)              |
| hepA qRT-R  | CCGGAAATCGTTGGCTTTGTGG    |                                    |
| hepB qRT-F  | ACGAACCCAATGCGTTGCAGT     | AORIB40_NS.11930 (hepB)            |
| hepB qRT-R  | GACTCGCCGAAGCTCCGCTA      |                                    |
| hepC qRT-F  | ATCGGACAGCACGTCCATTGC     | AO090011000410 (hepC)              |
| hepC qRT-R  | ACGAAACCGGATCGCTCAGCT     |                                    |
| hepD qRT-F  | ATCGGTGTTGGGATGCCCATGT    | AO090011000411 (hepD)              |
| hepD qRT-R  | GAAAGGTTGCAGAGCGCCTTTCT   |                                    |
| hepE qRT-F  | AGCGCCATCTGGGCTTTGGA      | AO090011000412 (hepE)              |
| hepE qRT-R  | AACCGTTCCGGGGGCCAGTTCA    |                                    |
| hepF qRT-F  | AGCCAGAGCATCGACTGCCCAT    | AO090011000413 (hepF)              |
| hepF qRT-R  | CAGGCCGACAATCCCAGAGCCA    |                                    |
| hepG qRT-F  | ACTTGACCTGTGCCTTGAGAA     | AO090011000414 (hepG)              |
| hepG qRT-R  | CAC TTGAGACAACATCATCCTCG  |                                    |
| hepH qRT-F  | ATCCTCGACGCTGCAGGAGACT    | AO090011000415 (hepH)              |
| hepH qRT-R  | TAGTCGCAGCTCTAAGGCGGAGT   |                                    |
| hepR qRT-F  | TGTAGGACCCGGTGCTGTGAC     | AO090011000416 (hepR)              |
| hepR qRT-R  | ATAGTGCCGTCGAAGCTCG       |                                    |
| hepS qRT-F  | CAGGAGAGTGTTTCTCGGACCATTG | AO090011000417 (hepS)              |
| hepS qRT-R  | CATGATCCGGTGCTGCCATGCA    |                                    |
| FPPS qRT-F  | TGGGATGGCTCACCGAGCTT      | AO090102000358 (FPP synthase)      |
| FPPS qRT-R  | TCCTGACGGTACCAGCATGGCTG   |                                    |
| HMGR qRT-F  | GGACCAAGGCTACGTCTGCCGT    | AO090120000217 (HMG-CoA reductase) |
| HMGR qRT-R  | CACAGCATGCACCGTGAACCA     |                                    |
| IPI qRT-F   | TTGCTGGCGAGACCGGTTCTGA    | AO090023000500 (IPP isomerase)     |
| IPI qRT-R   | CCAGGGGTACTTGCTCCGGCTT    |                                    |
| H2B qRT-F   | AAGAAGCGTGGAAGACCAGG      | AO090020000006 (Histone 2B)        |
| H2B qRT-R   | GACATGGCACGAGTGGAGATT     |                                    |
